# Supplementary material for: Fusion of the dendritic cell-targeting chemokine MIP3α to melanoma antigen Gp100 in a therapeutic DNA vaccine significantly enhances immunogenicity and survival in a mouse melanoma model
Source: J Immunother Cancer. 2016 Dec 20;4:96. doi: 10.1186/s40425-016-0189-y (PMC5168589; doi:10.1186/s40425-016-0189-y)
Supplement: Additional file 1: Figure S1. — Prophylactic vaccination protection confirmation. Mice were vaccinated three times over 2 week intervals with PBS or 50 μg MIP3α-gp100 by i.m. electroporation. Mice were challenged with a lethal dose of B16F10 (5 × 104) 2 weeks after the third immunization. Tumor time course was tracked and analyzed by linear regression models. Tumor growth was found to be significantly reduced (p < 0.001), replicating prior published data. Data represent one experiment with 5–6 mice per group. (DOCX 97 kb) [file 40425_2016_189_MOESM1_ESM.docx]

Additional File 1

Prophylactic vaccination protection confirmation. Mice were vaccinated three times over two week intervals with PBS or 50μg MIP3α-gp100 by i.m. electroporation. Mice were challenged with a lethal dose of B16F10 (5x104) two weeks after the third immunization. Tumor time course was tracked and analyzed by linear regression models. Tumor growth was found to be significantly reduced (p<0.001), replicating prior published data. Data represent one experiment with 5-6 mice per group.
