# Supplementary material for: Fusion of the dendritic cell-targeting chemokine MIP3α to melanoma antigen Gp100 in a therapeutic DNA vaccine significantly enhances immunogenicity and survival in a mouse melanoma model
Source: J Immunother Cancer. 2016 Dec 20;4:96. doi: 10.1186/s40425-016-0189-y (PMC5168589; doi:10.1186/s40425-016-0189-y)
Supplement: Additional file 3: Dataset. — Excel spreadsheet of dataset used in this publication. This file includes all of the data points shown in figures of this study. (XLSX 48 kb) [file 40425_2016_189_MOESM3_ESM.xlsx]

## Sheet: Serum Antibody Response
PBS	dMIP3α-gp100	MIP3α-gp100
-0.027	0.124	0.193
0.047	0.111	0.21
-0.021	0.027	0.112
0.033	0.07	0.302
0.07	0.186	0.225
0.054	0.095	0.4
0.084	0.148	0.312
0.041	0.331	0.354
		0.259
		0.367

## Sheet: %Splenic T-cells
PBS	dMIP3α-gp100	MIP3α-gp100
0.019	0.824	0.626
0.012	0.463	1.06
0.024	1.22	1.54
0.012	0.489	0.884
0.012	0.587	0.631
0.025	0.858	1.13
0	0.494	2.88
0	0.303	1.15
	1.27	2.7
		0.799

## Sheet: #Splenic T-cells
PBS	dMIP3α-gp100	MIP3α-gp100
2.59995	3.87096	4.16369
2.50653	4.02548	4.34586
2.8547	4.35817	4.50617
2.44456	4.08624	4.27871
2.25275	4.11353	4.17467
3.0103	4.41891	4.55861
	4.26867	4.91519
	3.85588	4.53752
	4.46131	5.00014
		4.53529

## Sheet: Tumor Time Course
Days Post Challenge	PBS								MIP3α-CSP								dMIP3α-gp100								MIP3α-gp100
10	18.2	72.38	42.7	50.25	36												38.5	40.8	84.75	57.6	39.96	15.4	19.36		26.79	26.01	22.09	19.2	18.8	12
11									21.16	64.61	86.58	53.3	89.25	72.54	66.69
12	36.4	126.96	94.16	124.63	71												87.12	83.66	135	95.88	58.65	20.25	46.08		52.2	57.25	39.69	35	31.96	18
13	53.75	183.75	151.29	147.2	82.36				50	86.92	124.46	70	154.78	110.4	124.46		116.16	135	193.21	145.14	60.5	30.25	63.18		58.87	67.45	60.59	40.15	31.68	19.5
14	86.81	217.35	169	162.36	139.59				56.65	95.7		92.82	181.35	116.27	124.8		140.8	121.38	208	216.66	73.6	49	149.35		67.98	81.19	62.25	77.42	41.87	19.2
15									97.92	137.16		171.13	222.3	188.7	187.2
16	183.6	307.5	272	278.4	156.4				121.04	181.5		201.78	252.7	216.2	263.84		199.08	161.59	303.01	242.08	93.5	78.2	169		85.8	118.9	100	189.44	50.41	31

## Sheet: Day 14 tumor sizes
PBS	dMIP3α-gp100	MIP3 α-gp100	MIP3α-CSP
191.52	109.5	112.35	56.65
111.74	169.4	30.09	95.7
199.08	229.9	130	92.82
232.56	174.24	91.72	181.35
92.15	106.25	14.58	116.27
86.81	219.78	114.84	124.8
217.35	89.25	93.81	174.02
169	140.8	67.98	215.38
162.36	121.38	81.19	100.33
139.59	208	62.25	282
	216.66	77.42	163.5
	73.6	41.87	214.63
	49	19.2	217.8
	149.35

## Sheet: Survival
Days post challenge	PBS	MIP3α-gp100	dMIP3α-gp100	MIP3α-CSP
21	1
16	1
17	1			1
17	1			1
19	1			1
21		1		1
21		1
21		1
24		1
27		1
31		1
19			1
19			1
17			1	1
16			1
21			1
24			1
24			1
15			1
16			1
17			1
18			1
19			1
20			1
20			1
17		1
17		1
19		1
19		1
22		1
24		1
25		1
15	1
15	1
17	1
17	1
18	1
18	1
20	1
13				1
23				1

## Sheet: Depletion Tumor Course
Days Post Challenge	PBS										Vacc+Isotype										Vacc+αCD4										Vacc+αCD8										Vacc+αCD4+αCD8
6	4	4.5	0	4.84	31.95	25.92	28.35	21.24			5	5	2	8.75	5.4	10.4	6.25	11.5	16.91		4	2.25	5.6	4	12.2	34.4	11.76	12.5	4		0	6.25	0	2	17.08	7.6	7.29	14.7	9.68		8.4	13.5	7.5	2	11.5	35.2	15.5	7.04
8	26.6	22.25		28	57.66	39	48.46	41.4			12	6.25	8.4	18	24.15	21.12	13.68	29.4	25.2		6	9	6.25	6	20.16	43	18.91	22.5	29.58		0	17.28		7	32.2	17.64	20.7	22.04	12.6		35.99	26.23	23.92	8	33.32	63.84	22.4	34.76
10	41.5	44.8	27.2	54.74							27	7.59	16.83	26							8.4	23.7	13.35	12.5							7.4	31.36	14.55	16.83							44.55	41.76	42.25	25.9
11					89.28	78.66	106.8	52.8							49.6	36.12	17.64	50.96	29.44						32.7	94.83	31.5	39.48	49						41.16	28.86	36	46.17	31.2						69.6	123.9	60.52	79.86
13	113.4	89.3	62.4	89.7	115.2	124.16	142.1	73.44			42	25.2	58	63.3	71.02	58.8	31.27	67.1	43.12		20.2	69.9	37.4	56.1	44.8	98.25	63.6	63.8	76.86		8	88.4	40	34.6	66.64	55.44	68.73	92.13	39.9		96.8	104.1	111.2	83.7	82.96	135.88	64.99	101.48

## Sheet: Depletion Day 13 Tumor Sizes
PBS	Vacc+Isotype	Vacc+αCD4	Vacc+αCD8	Vacc+αCD4+αCD8
113.4	42	20.2	8	96.8
89.3	25.2	69.9	88.4	104.1
62.4	58	37.4	40	111.2
89.7	63.3	56.1	34.6	83.7
115.2	71.02	44.8	66.64	82.96
124.16	58.8	98.25	55.44	135.88
142.1	31.27	63.6	68.73	64.99
73.44	67.1	63.8	92.13	101.48
	43.12	76.86	39.9

## Sheet: #CD8 TILs
PBS	dMIP3α-gp100	MIP3α-gp100	MIP3α-CSP
1.21261	52.9628	44.463	33.82
1.07494	46.1002	42.417	272.68
1.83141	13.7165	46.2448	49.48
4.05689	34.3447	30.6746
2.19246

## Sheet: #CD4 TILs
PBS	dMIP3α-gp100	MIP3α-gp100	MIP3α-CSP
2.74858	22.5758	14.7024	20.81
2.19662	8.635	33.2518	68.17
3.59499	39.9719	54.767	29.58
8.9957	53.9898	22.8634
4.83631

[truncated: 2 more sheets: %TILs Gp100-specific, #TILs gp100-specific]
